# Supplementary material for: Synergistic effect of metal oxidation states and surface acidity enhanced the trace ethylene adsorption of Ag/ZSM-5
Source: Royal Society of Chemistry journal article supplement (doi:10.1039/d2nj00373b), 2022-01-01
Supplement: d2nj00373b1.pdf [file d2nj00373b1.pdf]

**Synergistic effect of metal oxidation states and surface acidity enhanced the trace ethylene adsorption of Ag/ZSM-5**

Chunli Li\*, Huaming Yang, Ying Qi, Hao Li\*

*National-Local Joint Engineering Laboratory for Energy Conservation in Chemical Process Integration and Resources Utilization, School of Chemical Engineering and Technology, Hebei University of Technology, Tianjin 300130, China*

Supporting Information Table of Contents:

- 1. Fig. S1:** The N<sub>2</sub> adsorption-desorption isotherms of Ag/ZSM-5(85), Ag/ZSM-5(130) and Ag/ZSM-5(200).
- 2. Fig. S2:** (a), (b) The SEM images of Ag/ZSM-5(130); (c), (d) The TEM images of Ag/ZSM-5(130).
- 3. Fig. S3:** The breakthrough curves of pristine ZSM-5(130), ZSM-5(85), and reduced Ag/ZSM-5(130) at the experiment conditions.
- 4. Fig. S4:** (a) The breakthrough curves of Ag/ZSM-5(130) with six consecutive cycles; (b) The adsorption capacity of Ag/ZSM-5(130) with six consecutive cycles.
- 5. Fig. S5:** (a) High-resolution XPS spectra of Ag/ZSM-5(130) and reduced Ag/ZSM-5(130); (b) The TEM image of reduce Ag/ZSM-5(130).
- 6. Table S1:** Structural parameters of the adsorbents.

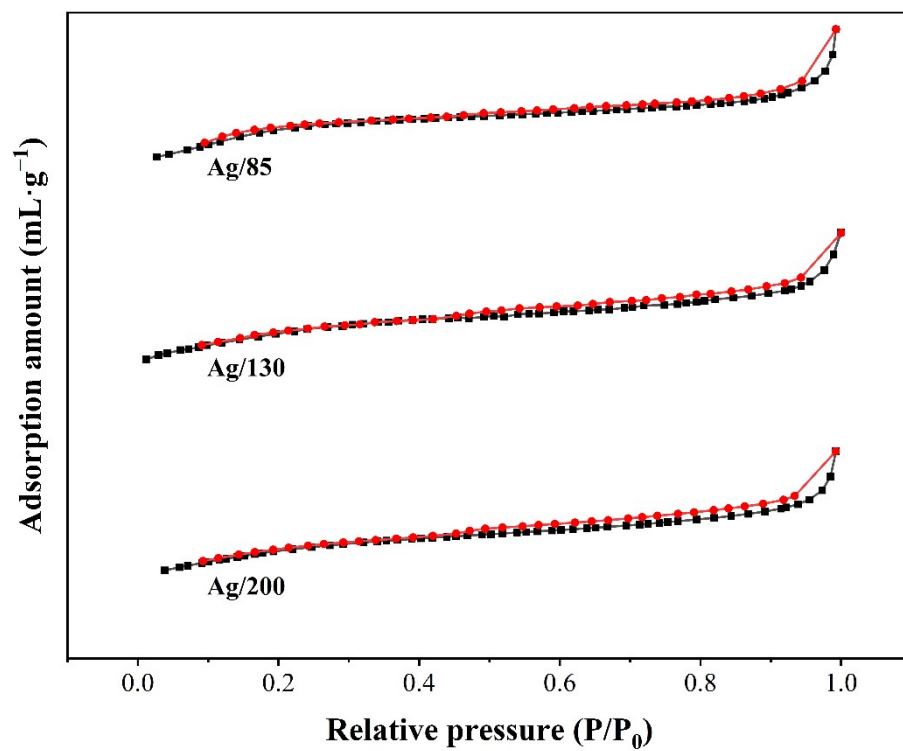

**Fig. S1.** The N<sub>2</sub> adsorption-desorption isotherms of Ag/ZSM-5(85), Ag/ZSM-5(130) and Ag/ZSM-5(200).

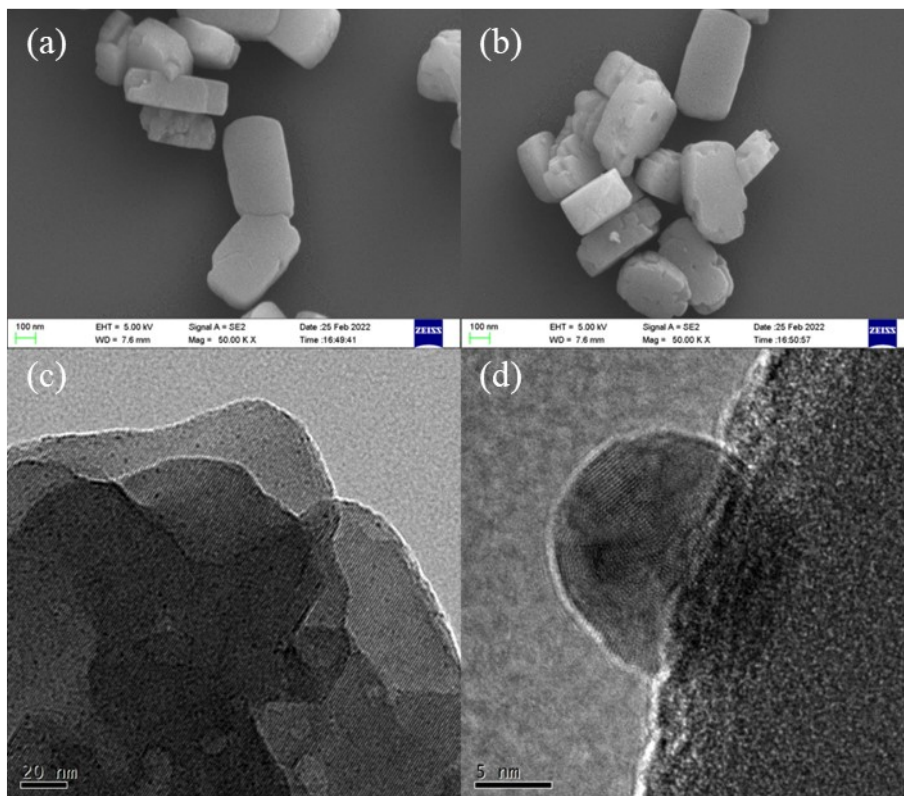

**Fig. S2.** (a), (b) The SEM images of Ag/ZSM-5(130); (c), (d) The TEM images of Ag/ZSM-5(130).

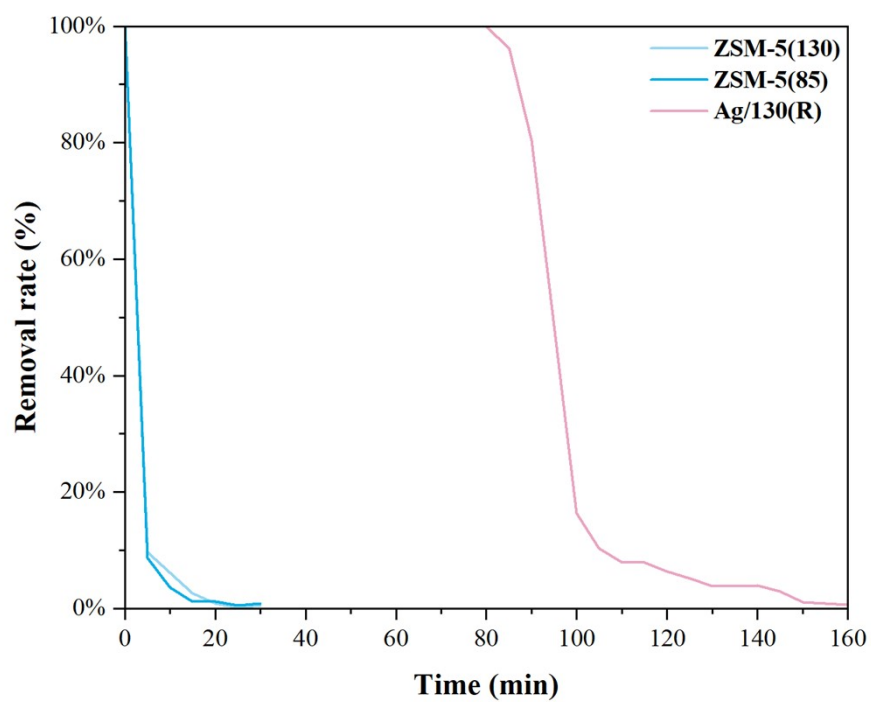

**Fig. S3.** The breakthrough curves of pristine ZSM-5(130), ZSM-5(85), and reduced Ag/ZSM-5(130) at the experiment conditions.

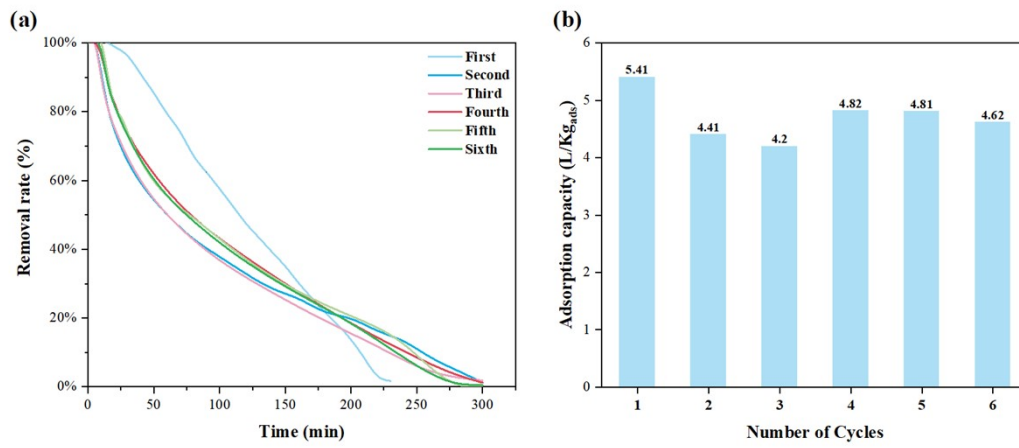

**Fig. S4.** (a) The breakthrough curves of Ag/ZSM-5(130) with six consecutive cycles; (b) The adsorption capacity of Ag/ZSM-5(130) with six consecutive cycles.

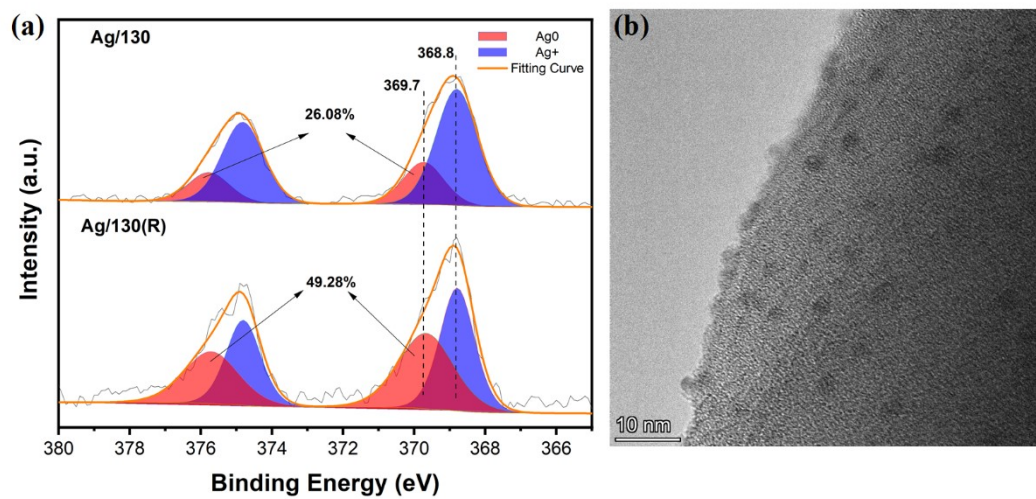

**Fig. S5.** (a) High-resolution XPS spectra of Ag/ZSM-5(130) and reduced Ag/ZSM-5(130); (b) The TEM image of reduce Ag/ZSM-5(130).

**Table S1.**

Structural parameters of the adsorbents.

| Adsorbent     | $S_{\text{total}}^{\text{a}}$<br>( $\text{m}^2\text{g}^{-1}$ ) | $V_{\text{total}}^{\text{b}}$<br>( $\text{cm}^3\text{g}^{-1}$ ) | $V_{\text{micro}}^{\text{c}}$<br>( $\text{cm}^3\text{g}^{-1}$ ) | $D^{\text{d}}$<br>(nm) | $\text{Ag}^{\text{e}}$<br>(%) |
|---------------|----------------------------------------------------------------|-----------------------------------------------------------------|-----------------------------------------------------------------|------------------------|-------------------------------|
| Ag/ZSM-5(38)  | 304.98                                                         | 0.205                                                           | 0.163                                                           | 0.731                  | -                             |
| Ag/ZSM-5(85)  | 370.84                                                         | 0.247                                                           | 0.174                                                           | 0.758                  | 0.504                         |
| Ag/ZSM-5(130) | 361.31                                                         | 0.248                                                           | 0.178                                                           | 0.639                  | 0.495                         |
| Ag/ZSM-5(200) | 362.30                                                         | 0.227                                                           | 0.173                                                           | 0.773                  | 0.498                         |
| Ag/ZSM-5(300) | 358.37                                                         | 0.208                                                           | 0.166                                                           | 0.652                  | -                             |
| ZSM-5-130     | 351.40                                                         | 0.237                                                           | 0.177                                                           | 0.809                  | -                             |

<sup>a</sup> Specific surface area obtained from BET equation ( $P/P_0 = 0.04-0.32$ ).

<sup>b</sup> Total pore volume calculated by NLDFT methods.

<sup>c</sup> NLDFT micropore volume.

<sup>d</sup> Average pore size obtained by using the HK method.

<sup>e</sup> Silver loaded content determined by ICP-OES.
